# Supplementary material
Source: PubMed Central journal article supplement (PMC3549037)

## **Supporting Information**

### **Site-specific non-covalent interaction of the biopolymer poly(ADP-ribose) with the Werner syndrome protein regulates protein functions**

Oliver Popp<sup>1, 2, a, c</sup>, Sebastian Veith<sup>1, 3, c</sup>, Jörg Fahrer<sup>1, b</sup>, Wilhelm A. Bohr<sup>4</sup>,  
Alexander Bürkle<sup>1</sup> \* and Aswin Mangerich<sup>1</sup> \*

**Supplementary Figure 1. Analytical HPLC fractionation of PAR and subsequent characterization of pooled fractions by sequencing gel analysis. A.** 100 nmol of PAR was separated by anion exchange HPLC using a complex salt gradient. Peaks 1-65 are indicated. Peaks X and Y represent long PAR with high branching frequency. **B.** Fractionated PAR was analyzed on modified sequencing gels and silver staining. 100 pmol of each pooled fraction as well as 2 nmol of unfractionated PAR (1-Y) were separated by 15 % native PAGE followed by silver staining. Fraction numbers refer to the peak sequence obtained during HPLC. BPB migrates at the same position as an ADP-ribose octamer. BPB, bromphenol blue; XC, xylene cyanol.

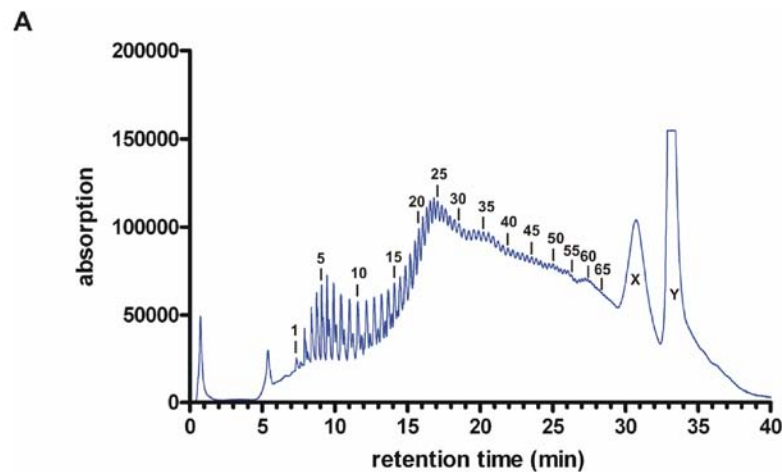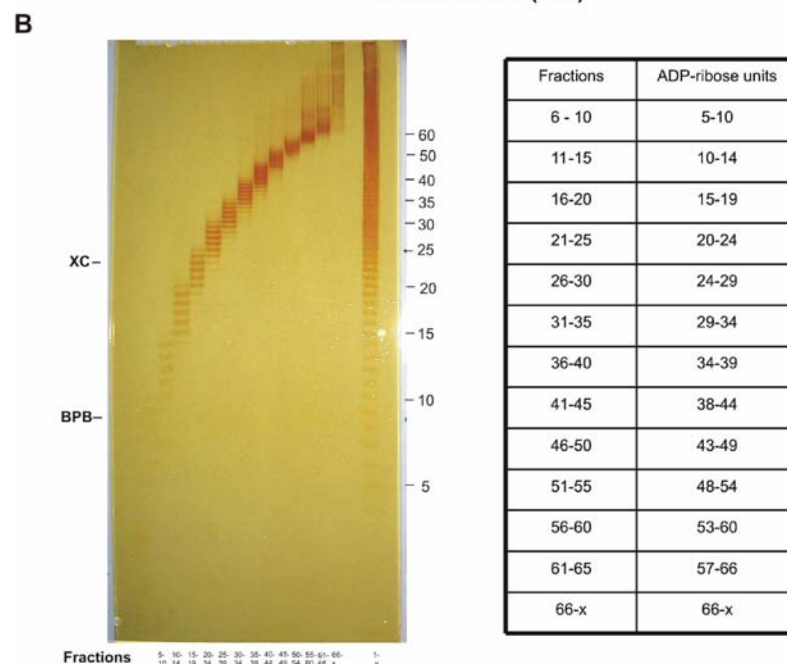

**Supplementary Figure 2. XPA binds longer PAR chains with higher affinity than short ones.**

**A.** PAR overlay slot-blot evaluating the dependency of XPA-PAR binding on PAR chain length. XPA (15 pmol/slot) was immobilized on a nitrocellulose membrane (in duplicates) and incubated with 0.2  $\mu$ M PAR of chain lengths as indicated. Removal of unspecific binding was ensured by high-stringency washing. Protein-bound PAR was detected using the anti-PAR monoclonal antibody 10H. **B.** Densitometric quantification of A, normalized to signals obtained from binding of unfractionated PAR.

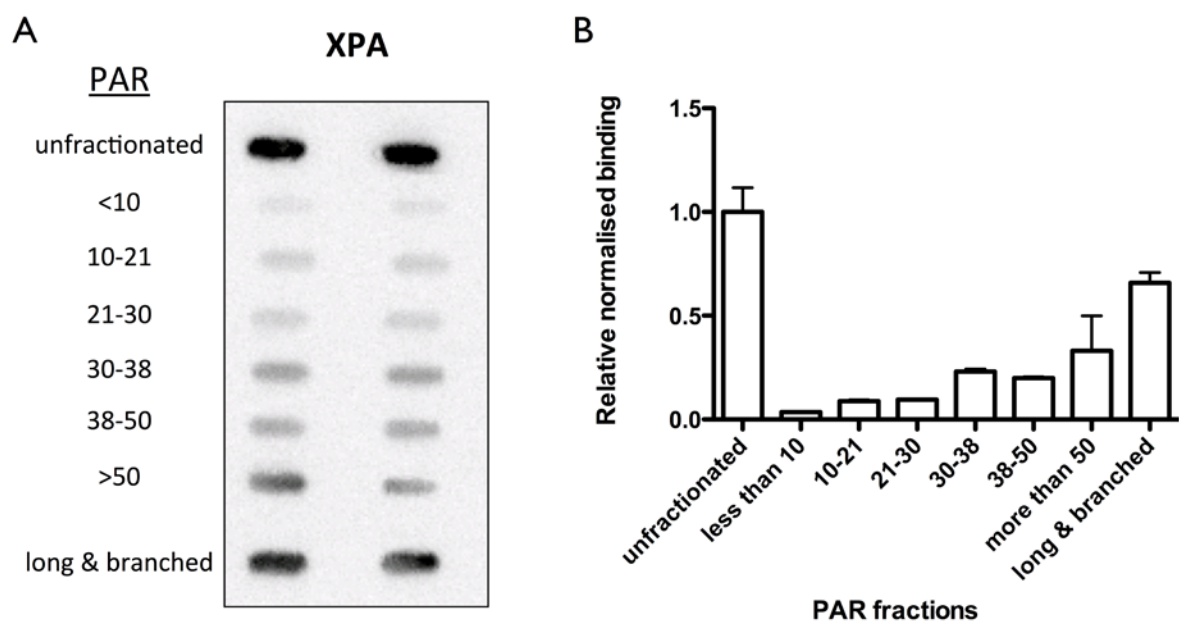

### Supplementary Figure 3. Confirmation of the inhibitory effect of PAR on WRN's exonuclease activity.

The impact of non-covalent PAR binding on WRN exonuclease activity was assessed by detection of a 5'-biotin-end-labeled oligonucleotide on a sequencing gel. **A.** WRN (40 nM) was pre-incubated with increasing concentrations of PAR as indicated. Exonuclease reaction was started by addition 300 fmol of a forked oligoduplex and carried out for 15 min. Following electrophoretic separation, products were immobilized on a nylon membrane, and detected via streptavidin-POD. A decrease in degradation of the oligonucleotide by increasing concentrations of PAR is observable. **B.** Densitometric evaluation from four independent experiments (means  $\pm$  SEM). Curve was fitted using a sigmoidal dose-response curve with variable slope. Statistical analysis was performed with ANOVA followed by Dunnett's multiple comparison post-test. \*\*\*  $p < 0.001$ .

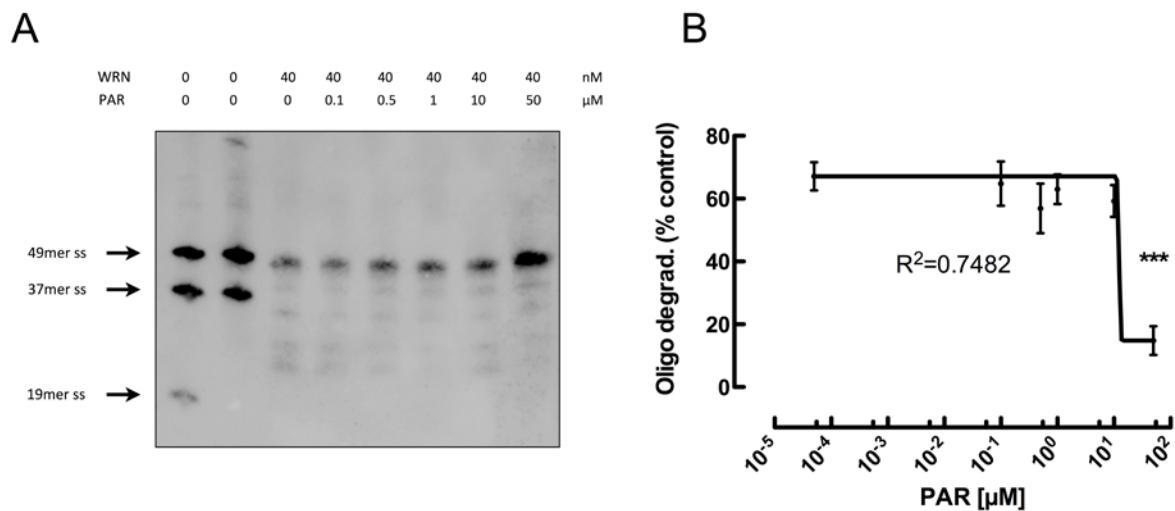

Supplement: NIHMS418446-supplement-1_si_005.pdf [file NIHMS418446-supplement-1_si_005.pdf]
